# Supplementary material
Source: publisher figshare collection journal article supplement (https://tandf.figshare.com/articles/dataset/_/27074830)
Supplement: Supplementary file 1 [file 1]

Declarations

Acknowledgement

We are sincerely grateful to Ms. Yuhuan Xiao for her invaluable assistance as an intern in the data support for this research. This work was also supported by International Big Science Program of the Deep-time Digital Earth (DDE).

Conflict of interest

The authors declare no competing interests.

Authors' contributions

Conceptualization, S. W. and Y. Z.; Methodology, S. W. and P. Q.; Investigation, S. W., P. Q., J. Y., P. P., Y. B., G. L., X. D, Y. Q. and Y. Q.; Writing – Original Draft, S. W., P. Q. and Y. Z.; Writing –Review & Editing, S. W. and P. Q.; Funding Acquisition, Y. Z., Y. B. and P. P.; Resources, S. W. and P. P.; Supervision, Y. Z.
